# Supplementary material
Source: MDPI journal article supplement (https://www.mdpi.com/2624-781X/4/1/4)
Supplement: s1 [file s1 › reactions-2084481-supplementary.pdf]

## SUPPLEMENTARY 1

### Weisz – Prater and Mears criteria: results of calculations

#### Internal diffusion

In order to determine if internal diffusion is limiting the reaction the Weisz – Prater criterion can be used. It uses measured values of the rate of reaction to determine if the reaction suffers from problem of internal diffusion as follows:

$$C_{WP} = \frac{\text{Actual reaction rate}}{\text{A diffusion rate}} = \frac{A\rho_c R^2}{D_e C_{CO,s-g}}.$$

Internal mass transfer effect can be neglected when the value of  $C_{WP}$  is less than 1 [S1].

The parameters used for the criterion calculations are represented in Table S1.

**Table S1.** Experimental parameters to calculate the CWP criterion at 483K, GHSV = 300 hr<sup>-1</sup>, 2 MPa

|                                              |                               |                         |
|----------------------------------------------|-------------------------------|-------------------------|
| A (μmol <sub>CO</sub> /(s·g <sub>Co</sub> )) | Observed reaction rate        | 5.4                     |
| ρ <sub>c</sub> , (kg/m <sup>3</sup> )        | Solid catalyst density        | 1166                    |
| R, m                                         | Radius of catalyst particle   | 0.00075                 |
| D <sub>e</sub> , m <sup>2</sup> /s           | Effective diffusivity         | 1.71 x 10 <sup>-6</sup> |
| C <sub>CO,s-g</sub> , (mol/l)                | Concentration of CO in syngas | 0.156                   |

The effective diffusivity  $D_e$  in the criterion will in this case be substituted by Knudsen diffusion because the average pore diameter ( $D_p$ ) is 4.8 nm and pore diffusion will therefore be dominated by Knudsen diffusion ( $D_{Kn}$ ) and is calculated by formula:

$$D_{Kn} = \frac{V_{ave} D_p}{3},$$

where  $V_{ave}$  is the average velocity for the CO.  $V_{ave}$  is calculated by the formula:

$$V_{ave} = [8k_B T / \pi m]^{1/2},$$

where  $k_B$  is Boltzmann's constant,  $m$  is the mass of molecular species and  $\pi$  is atomic mass unit.

The parameter  $C_{CO,s-g}$  is the gas concentration at the catalyst surface, which is calculated by the formula:

$$C_{CO,s-g} = \frac{N_{CO}}{V_{s-g}},$$

where  $N_{CO}$  is a quantity moles of CO and  $V_{s-g}$  is a volume of syngas.

The observed activity rates  $A$  for all of the reactions and corresponding Weisz – Prater Criterion are presented in the Table S2.

**Table S2.** The observed activity rates and corresponding Weisz – Prater criterion at 300 hr<sup>-1</sup>.

| Temperature |     | Activity                                     | Weisz – Prater Criterion |
|-------------|-----|----------------------------------------------|--------------------------|
| (°C)        | (K) | A (μmol <sub>CO</sub> /(s·g <sub>Co</sub> )) | $C_{WP}$                 |
| 180         | 453 | 0.8                                          | 0.001895                 |
| 190         | 463 | 1.3                                          | 0.003114                 |
| 200         | 473 | 2.4                                          | 0.005810                 |

|     |     |      |          |
|-----|-----|------|----------|
| 210 | 483 | 5.4  | 0.013210 |
| 232 | 505 | 10.2 | 0.025515 |
| 235 | 508 | 15.6 | 0.039138 |
| 237 | 510 | 18.6 | 0.046756 |
| 239 | 512 | 22.5 | 0.056671 |
| 241 | 514 | 22.9 | 0.057791 |
| 243 | 516 | 25.2 | 0.063719 |

As it mentioned above, the internal mass transfer effects can be neglected when the value of  $C_{WP}$  is less than 1. The maximum value of  $C_{WP}$  is 0.063. This indicates that internal mass transfer effects can be neglected.

#### External Diffusion

Mears criterion [S1] is used to check whether the reaction is limited by external diffusion which is given below:

$$C_m = \frac{A \rho_b R^2}{k_c C_{CO,s-g}} < 0.15.$$

The parameters used for the criterion calculations are represented in Table S3.

**Table S3.** Parameters values for calculating Mears criterion at 483K, 2 MPa and GHSV 300 hr<sup>-1</sup>

|                                                       |                               |         |
|-------------------------------------------------------|-------------------------------|---------|
| $A$ ( $\mu\text{molCO}/(\text{s} \cdot \text{gCo})$ ) | Observed reaction rate        | 5.4     |
| $\rho_v$ , $\text{kg}/\text{m}^3$                     | Bulk density                  | 638     |
| $R$ , m                                               | Radius of catalyst particle   | 0.00075 |
| $n$                                                   | Reaction order                | 0.5     |
| $\phi$                                                | Porosity of catalyst bed      | 0.45    |
| $C_{CO,s-g}$ , mol/l                                  | Concentration of CO in syngas | 0.156   |
| $k_c$ , m/s                                           | Mass transfer coefficient     | 0.098   |

Mass transfer coefficient  $k_c$  was found from Thones–Kramers correlation:

$$k_c = \frac{D_{CO,s-g} Sh (1-\phi)}{dp \phi},$$

were  $D_{CO,s-g}$  — diffusivity of CO in syngas mixture. Diffusivity of CO in H<sub>2</sub> is  $7.26 \times 10^{-4} \text{ m}^2/\text{s}$  at 822°C (1095K), based on literature [S2];

$Sh$  — Sherwood number;

$\phi$  — porosity of catalyst bed;

$dp$  – volume-average particle diameter, m.

The parameter  $C_{CO,s-g}$  is the gas concentration at the catalyst surface, which is calculated by the formula:

$$C_{CO,s-g} = \frac{N_{CO}}{V_{s-g}},$$

were  $N_{CO}$  is a quantity moles of CO and  $V_{s-g}$  is a volume of syngas.

The observed activity rates  $A$  for all of the reactions and corresponding Mears criterion are presented in the Table S4.

**Table S4.** The observed activity rates and corresponding Mears criterion at GHSV 300 hr<sup>-1</sup>

| Temperature |     | Activity                                     | Mears criterion |
|-------------|-----|----------------------------------------------|-----------------|
| (°C)        | (K) | A (μmol <sub>CO</sub> /(s·g <sub>Co</sub> )) | C <sub>m</sub>  |
| 180         | 453 | 0.8                                          | 0.000013        |
| 190         | 463 | 1.3                                          | 0.000021        |
| 200         | 473 | 2.4                                          | 0.000038        |
| 210         | 483 | 5.4                                          | 0.000084        |
| 232         | 505 | 10.2                                         | 0.000154        |
| 235         | 508 | 15.6                                         | 0.000235        |
| 237         | 510 | 18.6                                         | 0.000279        |
| 239         | 512 | 22.5                                         | 0.000336        |
| 241         | 514 | 22.9                                         | 0.000341        |
| 243         | 516 | 25.2                                         | 0.000374        |

The values of C<sub>m</sub> are in the order of 10<sup>-4</sup> – 10<sup>-5</sup>. This indicates that both internal and external diffusion transfer effects can be neglected.

## References

- S1. Fogler, H. S. Elements of Chemical Reaction Engineering (International Series in the Physical and Chemical Engineering Sciences). 5<sup>th</sup> edition. Pearson: 2016, pp. 957. ISBN 0133887510.
- S2. Kleiminger, L.; Li, T.; Li, K.; Kelsall, G.H. Syngas (CO-H<sub>2</sub>) production using high temperature micro-tubular solid oxide electrolyzers. *Electrochimica Acta* 2015, 179, 565–77. <https://doi.org/10.1016/j.electacta.2015.07.062>.
